# Supplementary material
Source: Springer Nature journal article supplement (https://www.springermedizin.de/resource/supplementary/12913_2009_1343_MOESM1_ESM.pdf/9527924)

Phase 1

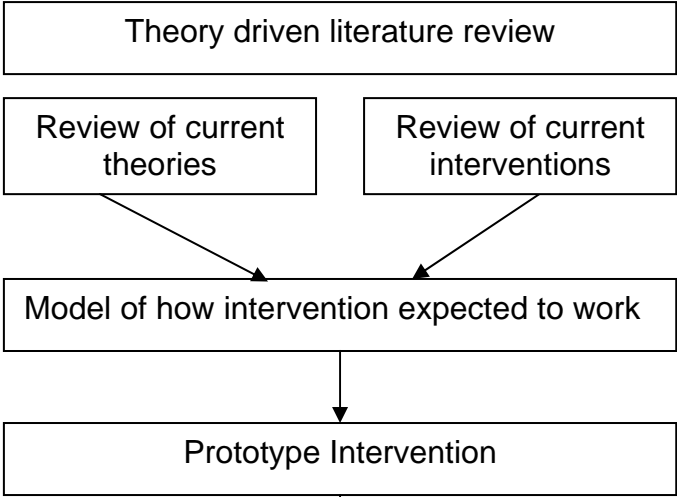

Phase 2

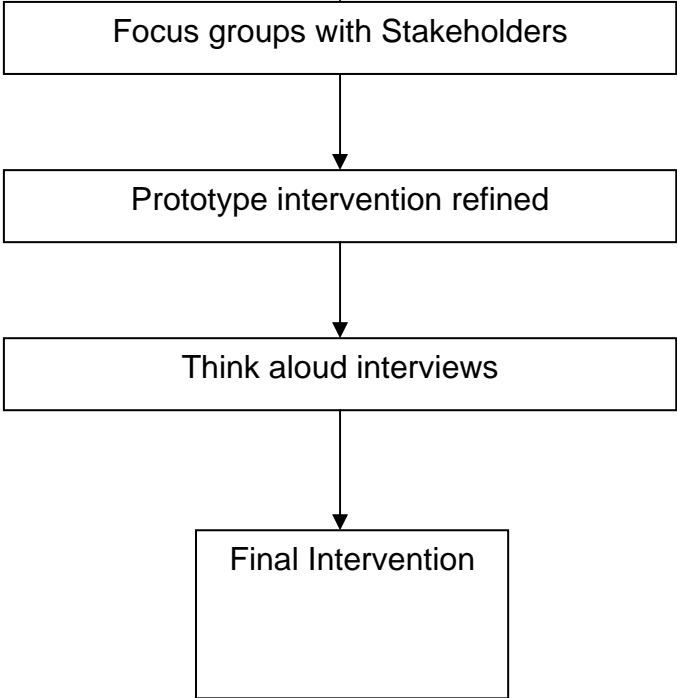

Supplement: MOESM1 [file 9527924]
